# Supplementary material for: CancerSCEM: a database of single-cell expression map across various human cancers
Source: PubMed Central journal article supplement — Nucleic Acids Res. 2021 Oct 13;50(D1):D1147–55. doi: 10.1093/nar/gkab905 (PMC8728207; doi:10.1093/nar/gkab905), 2021-10-13
Supplement: gkab905_supplemental_file.pdf [file gkab905_supplemental_file.pdf]

**Supplementary Table S1. Single-cell data statistics for each human cancer type**

| <i>Cancer type</i>                        | <i>Abbreviation</i> | <i>Protocols</i>                              | <i># Samples</i> | <i># Cell count in each sample</i> | <i># Average UMI count in each cell</i> | <i># Average gene count in each cell</i> | <i>Literatures</i>                                                                                                                                                                                                                                                                                                                                                                                                                                                                                            |
|-------------------------------------------|---------------------|-----------------------------------------------|------------------|------------------------------------|-----------------------------------------|------------------------------------------|---------------------------------------------------------------------------------------------------------------------------------------------------------------------------------------------------------------------------------------------------------------------------------------------------------------------------------------------------------------------------------------------------------------------------------------------------------------------------------------------------------------|
| Merkel Cell Carcinoma                     | MCC                 | 10X Genomics                                  | 4                | 2,401 – 5,477                      | 3,667 – 6,460                           | 1,496 – 2,326                            | <a href="https://pubmed.ncbi.nlm.nih.gov/30827681">https://pubmed.ncbi.nlm.nih.gov/30827681</a>                                                                                                                                                                                                                                                                                                                                                                                                               |
| Lung Adenocarcinoma                       | LUAD                | 10X Genomics                                  | 21               | 635 – 4,832                        | 2,204 – 15,218                          | 789 – 2,665                              | <a href="https://pubmed.ncbi.nlm.nih.gov/32042191">https://pubmed.ncbi.nlm.nih.gov/32042191</a><br><a href="https://pubmed.ncbi.nlm.nih.gov/29988129">https://pubmed.ncbi.nlm.nih.gov/29988129</a>                                                                                                                                                                                                                                                                                                            |
| Lung Squamous Cell Carcinoma              | LUSC                | 10X Genomics                                  | 7                | 105 – 1,586                        | 3,795 – 5,585                           | 973 – 1,285                              | <a href="https://pubmed.ncbi.nlm.nih.gov/29988129">https://pubmed.ncbi.nlm.nih.gov/29988129</a>                                                                                                                                                                                                                                                                                                                                                                                                               |
| Non-small Cell Lung Cancer                | NSCLC               | 10X Genomics                                  | 7                | 2,863 – 13,382                     | 2,688 – 8,867                           | 904 – 2,263                              | <a href="https://pubmed.ncbi.nlm.nih.gov/29988129">https://pubmed.ncbi.nlm.nih.gov/29988129</a>                                                                                                                                                                                                                                                                                                                                                                                                               |
| Triple Negative Breast Cancer             | TNBC                | 10X Genomics                                  | 6                | 333 – 1,964                        | 5,299 – 15,768                          | 1,394 – 3,879                            | <a href="https://pubmed.ncbi.nlm.nih.gov/33462507">https://pubmed.ncbi.nlm.nih.gov/33462507</a>                                                                                                                                                                                                                                                                                                                                                                                                               |
| Glioblastoma                              | GBM                 | Drop-seq, 10X Genomics, Smart-seq2, Microwell | 49               | 272 – 28,764                       | 558 – 927,701                           | 358 – 3,253                              | <a href="https://pubmed.ncbi.nlm.nih.gov/31883794">https://pubmed.ncbi.nlm.nih.gov/31883794</a><br><a href="https://pubmed.ncbi.nlm.nih.gov/32004492">https://pubmed.ncbi.nlm.nih.gov/32004492</a><br><a href="https://pubmed.ncbi.nlm.nih.gov/29091775">https://pubmed.ncbi.nlm.nih.gov/29091775</a><br><a href="https://pubmed.ncbi.nlm.nih.gov/30041684">https://pubmed.ncbi.nlm.nih.gov/30041684</a><br><a href="https://pubmed.ncbi.nlm.nih.gov/33975634/">https://pubmed.ncbi.nlm.nih.gov/33975634/</a> |
| Anaplastic Astrocytoma                    | AA                  | Microwell                                     | 1                | 6,960                              | 973                                     | 647                                      | <a href="https://pubmed.ncbi.nlm.nih.gov/30041684">https://pubmed.ncbi.nlm.nih.gov/30041684</a>                                                                                                                                                                                                                                                                                                                                                                                                               |
| Stomach Adenocarcinoma                    | STAD                | 10X Genomics                                  | 1                | 1,467                              | 9,763                                   | 2,152                                    | <a href="https://pubmed.ncbi.nlm.nih.gov/31067475">https://pubmed.ncbi.nlm.nih.gov/31067475</a>                                                                                                                                                                                                                                                                                                                                                                                                               |
| Colorectal Cancer                         | CRC                 | 10X Genomics                                  | 16               | 322 – 3,371                        | 2,412 – 16,633                          | 926 – 2,958                              | <a href="https://pubmed.ncbi.nlm.nih.gov/32451460">https://pubmed.ncbi.nlm.nih.gov/32451460</a>                                                                                                                                                                                                                                                                                                                                                                                                               |
| Neuroendocrine Tumor                      | NBL                 | 10X Genomics                                  | 2                | 855 – 2,518                        | 1,486 – 3,114                           | 819 – 1,406                              | <a href="https://pubmed.ncbi.nlm.nih.gov/32054662">https://pubmed.ncbi.nlm.nih.gov/32054662</a>                                                                                                                                                                                                                                                                                                                                                                                                               |
| Basal Cell Carcinoma                      | BCC                 | 10X Genomics                                  | 5                | 112 - 253                          | 3,572 – 11,569                          | 1,350 – 2,512                            | <a href="https://pubmed.ncbi.nlm.nih.gov/31359002">https://pubmed.ncbi.nlm.nih.gov/31359002</a>                                                                                                                                                                                                                                                                                                                                                                                                               |
| Ovarian Carcinoma                         | OV                  | 10X Genomics                                  | 4                | 3,439 – 5,846                      | 6,584 – 10,348                          | 2,459 – 3,135                            | <a href="https://pubmed.ncbi.nlm.nih.gov/32054838">https://pubmed.ncbi.nlm.nih.gov/32054838</a>                                                                                                                                                                                                                                                                                                                                                                                                               |
| Mixed-phenotype Acute Leukemia            | MPAL                | 10X Genomics                                  | 10               | 195 – 5,643                        | 2,009 – 4,151                           | 1,035 – 1,906                            | <a href="https://pubmed.ncbi.nlm.nih.gov/31792411">https://pubmed.ncbi.nlm.nih.gov/31792411</a>                                                                                                                                                                                                                                                                                                                                                                                                               |
| Muscle-invasive Urothelial Bladder Cancer | MIUBC               | 10X Genomics                                  | 1                | 1,809                              | 3,690                                   | 2,148                                    | <a href="https://pubmed.ncbi.nlm.nih.gov/32460812">https://pubmed.ncbi.nlm.nih.gov/32460812</a>                                                                                                                                                                                                                                                                                                                                                                                                               |
| Endometrial Carcinoma                     | UCEC                | 10X Genomics                                  | 6                | 329 – 1,436                        | 14,187 – 17,930                         | 3,050 – 3,971                            | <a href="https://pubmed.ncbi.nlm.nih.gov/32686114">https://pubmed.ncbi.nlm.nih.gov/32686114</a>                                                                                                                                                                                                                                                                                                                                                                                                               |
| Hepatocellular Cancer                     | HCC                 | 10X Genomics                                  | 2                | 2,888 – 6,582                      | 2,965 – 3,116                           | 1,001 – 1,085                            | <a href="https://pubmed.ncbi.nlm.nih.gov/30068984">https://pubmed.ncbi.nlm.nih.gov/30068984</a>                                                                                                                                                                                                                                                                                                                                                                                                               |
| Anaplastic Thyroid Cancer                 | ATC                 | 10X Genomics                                  | 5                | 1,174 – 5,861                      | 6,035 – 14,794                          | 1,824 – 3,098                            | <a href="https://pubmed.ncbi.nlm.nih.gov/33462507">https://pubmed.ncbi.nlm.nih.gov/33462507</a>                                                                                                                                                                                                                                                                                                                                                                                                               |
| Pancreatic Ductal Adenocarcinoma          | PDAC                | 10X Genomics                                  | 24               | 1,079 – 8,202                      | 2,819 – 8,093                           | 1,177 – 2,502                            | <a href="https://pubmed.ncbi.nlm.nih.gov/31273297">https://pubmed.ncbi.nlm.nih.gov/31273297</a>                                                                                                                                                                                                                                                                                                                                                                                                               |
| Breast Ductal Carcinoma in Situ           | DCIS                | 10X Genomics                                  | 1                | 1,114                              | 14,234                                  | 3,428                                    | <a href="https://pubmed.ncbi.nlm.nih.gov/33462507">https://pubmed.ncbi.nlm.nih.gov/33462507</a>                                                                                                                                                                                                                                                                                                                                                                                                               |
| Acute Myeloid Leukemia                    | AML                 | Seq-Well                                      | 36               | 285 – 5,996                        | 687 – 4,651                             | 389 – 1,751                              | <a href="https://pubmed.ncbi.nlm.nih.gov/30827681">https://pubmed.ncbi.nlm.nih.gov/30827681</a>                                                                                                                                                                                                                                                                                                                                                                                                               |

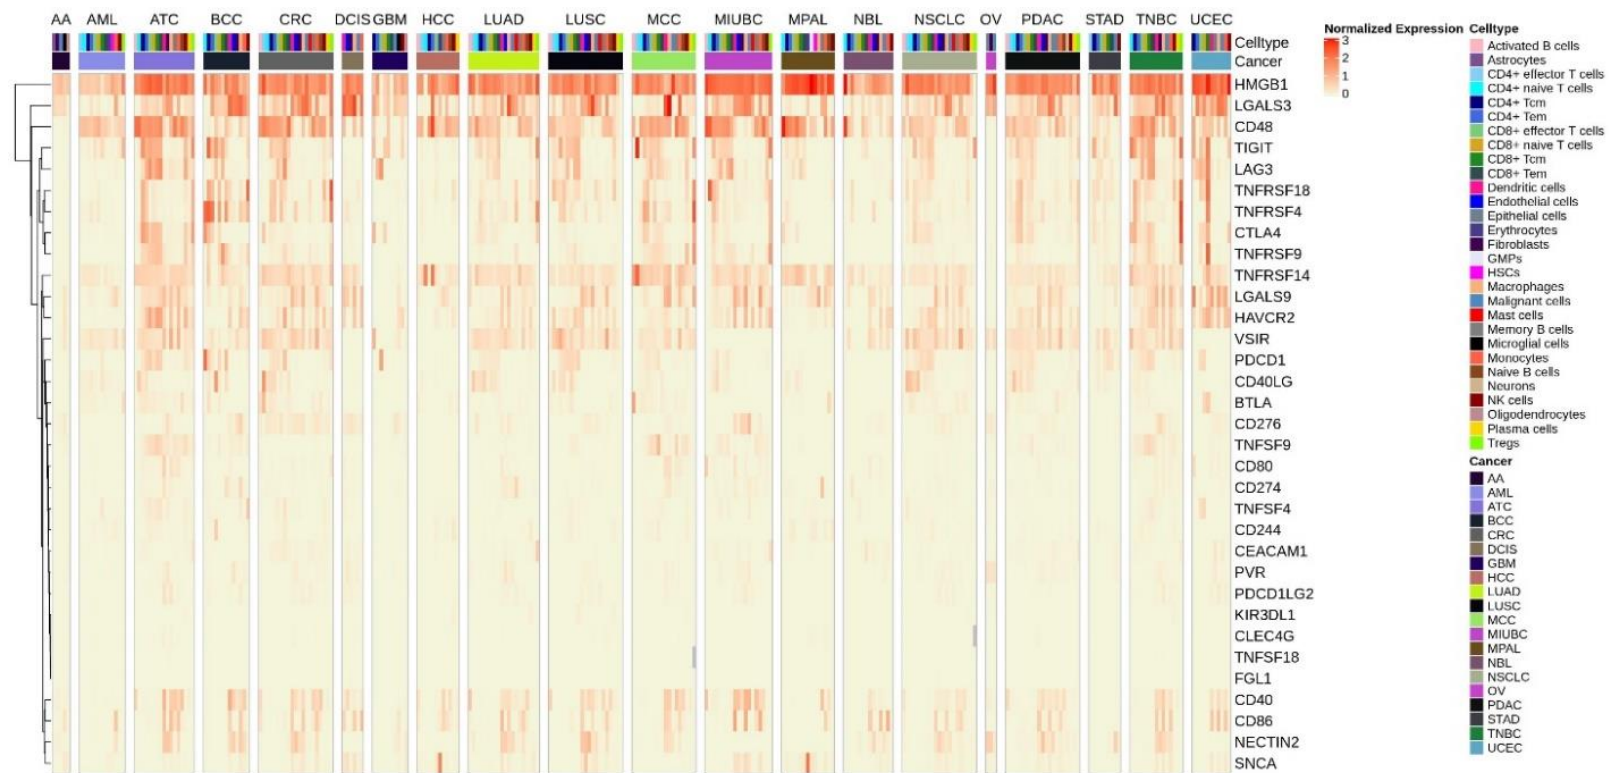

**Supplementary Figure S1. The average expression pattern of immune checkpoint molecules across 20 human cancer types.** For each cancer type, only one sample with relatively larger sample size and higher cell diversities was selected, and the average expression values were calculated for each specific cell type and marked with different colors (legend on the right panel). The normalized expressions range from 0 (beige) to 3 (red).
